# Supplementary material for: Enzymatic Reaction-Related Protein Degradation and Proteinaceous Amino Acid Metabolism during the Black Tea (Camellia sinensis) Manufacturing Process
Source: PubMed Central journal article supplement (PMC7022896; doi:10.3390/foods9010066), 2020-01-08
Supplement: foods-09-00066-s001.pdf [file foods-09-00066-s001.pdf]

Article

# Enzymatic Reaction-related Protein Degradation and Proteinaceous Amino Acid Metabolism during the Black Tea (*Camellia sinensis*) Manufacturing Process

Yiyong Chen <sup>1,2,†</sup>, Lanting Zeng <sup>2,3,†</sup>, Yinyin Liao <sup>2</sup>, Jianlong Li <sup>1</sup>, Bo Zhou <sup>1</sup>, Jinchi Tang <sup>1,\*</sup>, Ziyin Yang <sup>2,3,\*</sup>

- <sup>1</sup> Tea Research Institute, Guangdong Academy of Agricultural Sciences & Guangdong Provincial Key Laboratory of Tea Plant Resources Innovation and Utilization, Dafeng Road 6, Tianhe District, Guangzhou 510640, China; cheniyong@gdaas.cn (Y.C.); skylong.41@163.com (J.L.); zhoub@gdaas.cn (B.Z.);
- <sup>2</sup> Key Laboratory of South China Agricultural Plant Molecular Analysis and Genetic Improvement & Guangdong Provincial Key Laboratory of Applied Botany, South China Botanical Garden, Chinese Academy of Sciences, Xingke Road 723, Tianhe District, Guangzhou 510650, China; zenglanting@scbg.ac.cn (L.Z.); honey\_yyliao@scbg.ac.cn (Y.L.)
- <sup>3</sup> Center of Economic Botany, Core Botanical Gardens, Chinese Academy of Sciences, Xingke Road 723, Tianhe District, Guangzhou 510650, China

† These authors contributed equally to this work.

\* Correspondence: tangjinchi@126.com; Tel.: +86-20-8516-1049 (J.T.); zyyang@scbg.ac.cn; Tel.: +86-20-3807-2989 (Z.Y.)

Received: 9 October 2019; Accepted: 20 December 2019; Published: 8 January 2020

## Supplementary Information

**Table S1.** The changes of water content in tea leaves during black tea manufacturing process.

|                   | Plucking     | Withering    | Rolling      | Fermentation | Drying      |
|-------------------|--------------|--------------|--------------|--------------|-------------|
| Water content (%) | 78.03 ± 0.02 | 56.11 ± 0.04 | 51.42 ± 0.04 | 50.93 ± 0.01 | 5.36 ± 0.06 |

**Table S2.** Contents of free amino acids in tea leaves of simulated the black tea fermentation.

| Amino acid<br>µg/g (Dry weight) | Fresh tea leaves<br>(0h)       | Fermentation (6h)             |                                |
|---------------------------------|--------------------------------|-------------------------------|--------------------------------|
|                                 |                                | Intact                        | Crushed                        |
| P-Ser                           | 130.16 ± 2.96 <sup>ab</sup>    | 145.18 ± 10.95 <sup>a</sup>   | 175.85 ± 43.04 <sup>a</sup>    |
| PEA                             | 132.48 ± 6.81 <sup>b</sup>     | 193.80 ± 31.08 <sup>a</sup>   | 14.47 ± 4.05 <sup>c</sup>      |
| Asp                             | 14.67 ± 4.98 <sup>b</sup>      | 22.83 ± 3.13 <sup>a</sup>     | 18.73 ± 8.30 <sup>ab</sup>     |
| Thr                             | 147.39 ± 43.53 <sup>a</sup>    | 182.56 ± 25.59 <sup>a</sup>   | 154.16 ± 38.64 <sup>a</sup>    |
| Ser                             | 190.70 ± 15.82 <sup>c</sup>    | 264.17 ± 13.03 <sup>b</sup>   | 441.50 ± 52.06 <sup>a</sup>    |
| Asn                             | 75.14 ± 19.21 <sup>b</sup>     | 311.48 ± 33.49 <sup>a</sup>   | 77.84 ± 49.18 <sup>b</sup>     |
| Glu                             | 1220.89 ± 144.98 <sup>b</sup>  | 1364.41 ± 282.47 <sup>b</sup> | 2072.11 ± 423.79 <sup>a</sup>  |
| Thea                            | 4546.86 ± 1024.10 <sup>a</sup> | 5102.98 ± 681.50 <sup>a</sup> | 6097.05 ± 1681.02 <sup>a</sup> |
| α-AAA                           | 29.86 ± 26.61 <sup>b</sup>     | 82.25 ± 17.51 <sup>a</sup>    | 11.53 ± 9.91 <sup>b</sup>      |
| Gly                             | 35.53 ± 0.81 <sup>a</sup>      | 34.09 ± 28.49 <sup>a</sup>    | 40.23 ± 7.11 <sup>a</sup>      |
| Ala                             | 101.06 ± 13.44 <sup>b</sup>    | 125.77 ± 28.12 <sup>b</sup>   | 274.45 ± 59.18 <sup>a</sup>    |
| α-ABA                           | 16.12 ± 5.30 <sup>a</sup>      | 16.89 ± 3.32 <sup>a</sup>     | 15.43 ± 4.36 <sup>a</sup>      |
| Cit                             | 13.30 ± 21.13 <sup>a</sup>     | 1.83 ± 0.21 <sup>a</sup>      | 2.98 ± 1.55 <sup>a</sup>       |
| Val                             | 119.36 ± 40.01 <sup>b</sup>    | 407.71 ± 50.03 <sup>a</sup>   | 70.43 ± 14.30 <sup>c</sup>     |
| Cys                             | 30.77 ± 7.73 <sup>b</sup>      | 149.19 ± 59.09 <sup>a</sup>   | 11.68 ± 4.36 <sup>c</sup>      |
| Met                             | 8.83 ± 6.16 <sup>b</sup>       | 186.29 ± 124.97 <sup>a</sup>  | 2.12 ± 0.97 <sup>b</sup>       |
| Ile                             | 109.19 ± 38.20 <sup>b</sup>    | 332.75 ± 119.60 <sup>a</sup>  | 26.57 ± 10.82 <sup>c</sup>     |
| Leu                             | 75.26 ± 15.68 <sup>b</sup>     | 265.38 ± 106.85 <sup>a</sup>  | 52.39 ± 44.52 <sup>b</sup>     |
| Tyr                             | 101.43 ± 10.93 <sup>b</sup>    | 436.84 ± 85.76 <sup>a</sup>   | 1.44 ± 2.50 <sup>c</sup>       |
| Phe                             | 288.87 ± 21.82 <sup>b</sup>    | 649.26 ± 82.15 <sup>a</sup>   | 39.96 ± 9.77 <sup>c</sup>      |
| β-Ala                           | 12.81 ± 0.12 <sup>b</sup>      | 50.83 ± 11.37 <sup>a</sup>    | 13.4 ± 5.38 <sup>b</sup>       |
| β-ABA                           | 4.54 ± 1.27 <sup>a</sup>       | 20.74 ± 19.62 <sup>a</sup>    | 20.49 ± 18.33 <sup>a</sup>     |
| GABA                            | 22.36 ± 3.61 <sup>b</sup>      | 120.67 ± 28.39 <sup>a</sup>   | 4.96 ± 0.82 <sup>c</sup>       |
| His                             | 47.98 ± 67.60 <sup>a</sup>     | 112.74 ± 91.91 <sup>a</sup>   | 7.65 ± 6.45 <sup>a</sup>       |
| 1Mehis                          | 2.60 ± 0.92 <sup>a</sup>       | 2.25 ± 1.73 <sup>a</sup>      | 1.56 ± 0.72 <sup>a</sup>       |
| Trp                             | 198.88 ± 143.53 <sup>a</sup>   | 291.67 ± 27.86 <sup>ab</sup>  | 107.82 ± 122.81 <sup>a</sup>   |
| ORN                             | 269.81 ± 221.78 <sup>ab</sup>  | 511.05 ± 136.14 <sup>a</sup>  | 92.56 ± 101.36 <sup>b</sup>    |
| Lys                             | 149.50 ± 69.70 <sup>b</sup>    | 323.17 ± 30.37 <sup>a</sup>   | 50.30 ± 54.02 <sup>b</sup>     |
| Arg                             | 75.01 ± 41.28 <sup>b</sup>     | 154.52 ± 34.90 <sup>a</sup>   | 22.34 ± 26.52 <sup>b</sup>     |

Data are expressed as mean ± S.D. (n=3). P-Ser, Phosphoserine. PEA, Phosphorylethanolamine. Asp, Aspartic acid. Thr, Threonine. Ser, Serine. Asn, Asparagine. Glu, Glutamate. Thea, Theanine. α-AAA, α-amino acetic

acid. Gly, Glycine. Ala, Alanine.  $\alpha$ -ABA,  $\alpha$ -Aminobutyric acid. Cit, Citrulline. Val, Valine. Cys, Cystine. Met, Methionine. Ile, Isoleucine. Leu, Leucine. Tyr, Tyrosine. Phe, Phenylalanine.  $\beta$ -Ala,  $\beta$ -Alanine.  $\beta$ -ABA,  $\beta$ -Aminobutyric acid. GABA,  $\gamma$ -Aminobutyric acid. His, Histidine. 1Mehis, 1-Methyl histidine. Trp, Tryptophan. ORN, Ornithine. Lys, lysine. Arg, Arginine. Different means with different letters in the same row are significantly different from each other ( $p \leq 0.05$ ).

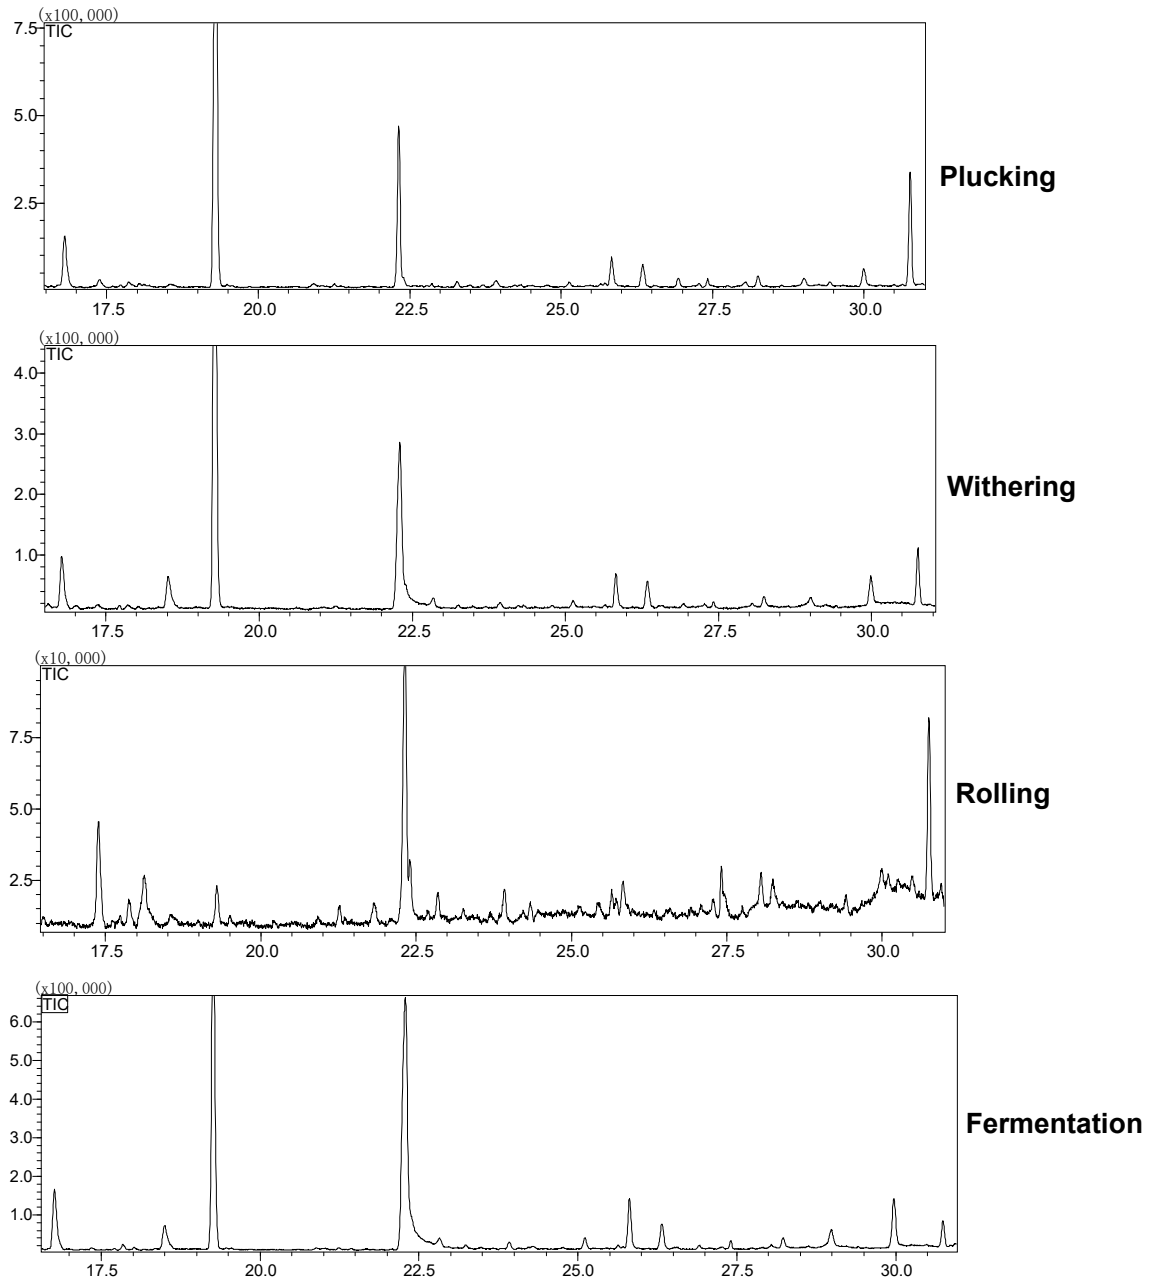

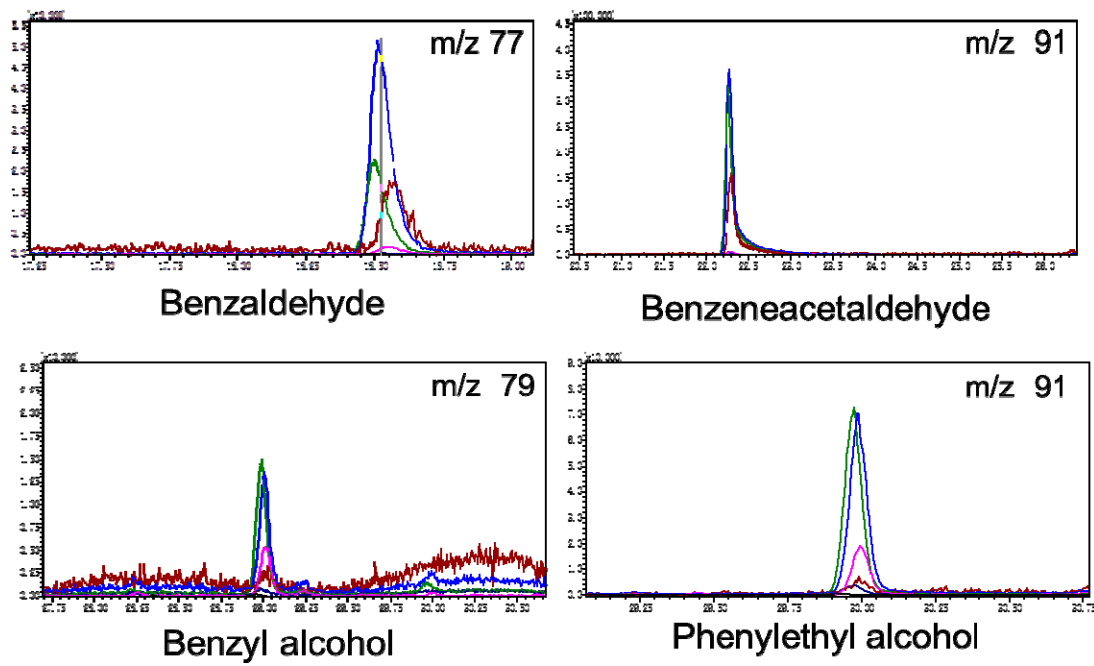

**Figure S1.** GC-MS chromatograms of aroma compound in tea leaves during black tea manufacturing process.
